# Supplementary material for: A new imidazolium-based polymeric ionic liquid gel with high adsorption capacity for perrhenate
Source: Royal Society of Chemistry journal article supplement (doi:10.1039/c6ra12239f), 2016-01-01
Supplement: c6ra12239f1.pdf [file c6ra12239f1.pdf]

**Electronic Supplementary Material**  
**Radiation Synthesis of an Imidazole Polymeric Ionic**  
**Liquid Gel with High Adsorption Capacity for**  
**Perrhenate**

**Dong Han<sup>1</sup>, Xingxiao Li<sup>1</sup>, Jing Peng<sup>1</sup>, Ling Xu<sup>2</sup>, Jiuqiang Li<sup>1</sup>, Huibo Li<sup>3</sup>, Maolin  
Zhai<sup>1</sup>**

<sup>1</sup>Beijing National Laboratory for Molecular Sciences, Radiochemistry and Radiation  
Chemistry Key Laboratory of Fundamental Science, the Key Laboratory of Polymer  
Chemistry and Physics of the Ministry of Education, College of Chemistry and  
Molecular Engineering, Peking University, Beijing 100871, China

<sup>2</sup> Department of Energy and Resources Engineering, College of Engineering, Peking  
University, Beijing 100871, P. R. China

<sup>3</sup>China Institute of Atomic Energy, Beijing 102413, China

\*Corresponding author: *E-mail address:* mlzhai@pku.edu.cn

## 1. Synthesis and Characterization of C<sub>6</sub>vim<sub>2</sub>Br<sub>2</sub>

24.4 g (0.100 mol) 1,6-dibromohexane and 21.0 g (0.223 mol) 1-vinylimidazole was mixed into 30mL acetonitrile, and kept in dark for 1 week at room temperature, then white solid product was obtained (Scheme S1). The crude product was filtered and washed by acetone for several times, and then dried in air to get the final product C<sub>6</sub>vim<sub>2</sub>Br<sub>2</sub>.

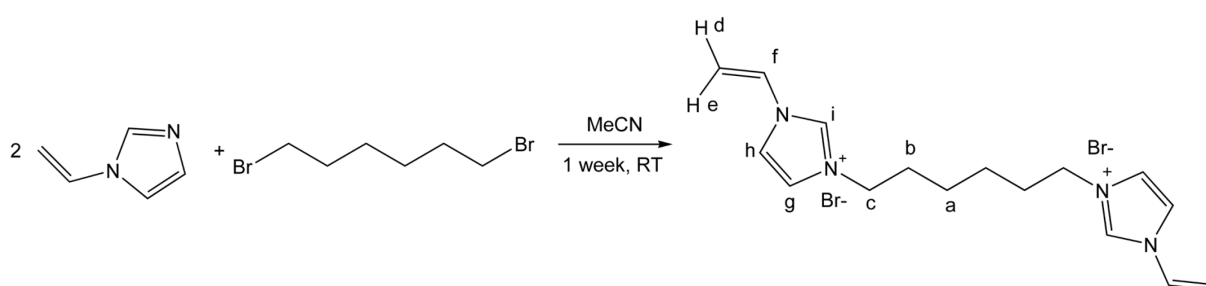

Scheme S1 Synthesis route of C<sub>6</sub>vim<sub>2</sub>Br<sub>2</sub>

C<sub>6</sub>vim<sub>2</sub>Br<sub>2</sub> was characterized by <sup>1</sup>H NMR (Bruker AVANCE III, 500 MHz), Elemental analysis (EA, Elementar Vario MICRO CUBE) and ESI-MS (Bruker Apex IV FTMS, positive mode). <sup>1</sup>H NMR(d<sub>6</sub>-DMSO): δ=1.32(4H<sub>a</sub>), 1.86(4H<sub>b</sub>), 4.24(4H<sub>c</sub>), 5.44(2H<sub>d</sub>), 6.01(2H<sub>e</sub>), 7.34(2H<sub>f</sub>), 8.01(2H<sub>g</sub>), 8.26(2H<sub>h</sub>), 9.71(2H<sub>i</sub>). EA: 13.0% N, 44.4% C, 5.6% H, which were agreed with the calculated data. ESI-MS: the main peaks occurred at m/z=351.1 and 353.1, which were the isotope peaks of C<sub>6</sub>vim<sub>2</sub>Br<sup>+</sup>.

## 2. Adsorption capacities of reported ReO<sub>4</sub><sup>-</sup> adsorbents

Adsorption capacities of recently reported ReO<sub>4</sub><sup>-</sup> adsorbents were listed in Table S2. PC<sub>2</sub>vimBr gel had the highest capacity of Re at 8.6×10<sup>2</sup> mg·g<sup>-1</sup>.

Table S1 Adsorption capacities of reported ReO<sub>4</sub><sup>-</sup> adsorbents

| Adsorbent   | Adsorption capacity (mg·g <sup>-1</sup> ) <sup>a</sup> | Remarks                      | Ref. |
|-------------|--------------------------------------------------------|------------------------------|------|
| PS-g-4VP-IE | 252                                                    | theoretical maximum capacity | [1]  |

|                                            |                     |                                  |           |
|--------------------------------------------|---------------------|----------------------------------|-----------|
| bio-char from <i>Acidosasa edulis</i>      | 14.6                | under the optimum conditions.    | [2]       |
| surface ion-imprinted microsphere          | 62.8                | pH = 6, Langmuir model           | [3]       |
| 2-VP grafted PP                            | ca. 113             | pH = 2.2, estimated from figures | [4]       |
| amino-functionalized nano-SiO <sub>2</sub> | 3.68                | pH = 2.0, Langmuir model         | [5]       |
| gel-like polymers containing polyamine     | 803                 | Langmuir model                   | [6]       |
| PC <sub>2</sub> vimBr gel                  | 8.6×10 <sup>2</sup> | Langmuir model                   | This work |

<sup>a</sup> Unit of adsorption capacity was converted to mg·g<sup>-1</sup>(Re) to make it easy to be compared

## References

1. J. H. Zu, M. S. Ye, P. Y. Wang, F. D. Tang and L. F. He, *RSC Adv.*, 2016, **6**, 18868-18873.
2. H. Hu, B. Jiang, J. Zhang and X. Chen, *RSC Adv.*, 2015, **5**, 104769-104778.
3. X. Shu, L. Shen, Y. Wei and D. Hua, *Journal of Molecular Liquids*, 2015, **211**, 621-627.
4. J.-H. Zu, Y.-Z. Wei, M.-S. Ye, F.-D. Tang, L.-F. He and R.-Q. Liu, *Nuclear Science and Techniques*, 2015, **26**, 510302 (510307 pp.)-510302 (510307 pp.).
5. Y. Li, Q. Wang, Q. Li, Z. Zhang, L. Zhang and X. Liu, *Journal of the Taiwan Institute of Chemical Engineers*, 2015, **55**, 126-132.
6. B. Gierczyk, M. Ceglowski and M. Zalas, *Plos One*, 2015, **10**.
